# Supplementary material
Source: PubMed Central journal article supplement (PMC3591977)
Supplement: AEM.02976-12_zam999104180so7.pdf [file AEM.02976-12_zam999104180so7.pdf]

**Table S4.** Unique regions in *Portiera* WB genome within or near (100bp) gene-coding regions.

| Genome | Start  | End    | Length | Distance to genic region (Genome name_gene start_gene end, name)                                                                                        |
|--------|--------|--------|--------|---------------------------------------------------------------------------------------------------------------------------------------------------------|
| WB     | 121415 | 121421 | 7      | Portiera_wb_120881_123753 Large Subunit Ribosomal RNA; lsuRNA; LSU rRNA                                                                                 |
| WB     | 135990 | 136117 | 128    | Portiera_wb_135789_136013 hypothetical protein                                                                                                          |
| WB     | 136773 | 136779 | 7      | Portiera_wb_136458_136799 hypothetical protein Portiera_wb_136822_137061 5'end SSU ribosomal protein S18p                                               |
| WB     | 156697 | 156739 | 43     | Portiera_wb_156550_156669 3'end hypothetical protein                                                                                                    |
| WB     | 157241 | 157246 | 6      | Portiera_wb_157238_157363 hypothetical protein                                                                                                          |
| WB     | 173624 | 173663 | 40     | Portiera_wb_173739_173578 hypothetical protein Portiera_wb_176146_173732 5'end Protein export cytoplasm protein SecA ATPase RNA helicase (TC 3.A.5.1.1) |
| WB     | 240548 | 240553 | 6      | Portiera_wb_240577_240407 hypothetical protein                                                                                                          |
| WB     | 244965 | 244969 | 5      | Portiera_wb_245487_244999 5'end Galactose-proton symport                                                                                                |
| WB     | 246889 | 246891 | 3      | Portiera_wb_246562_247932 Glucose-6-phosphate 1-dehydrogenase (EC 1.1.1.49)                                                                             |
| WB     | 257675 | 257685 | 11     | Portiera_wb_257506_257579 3'end tRNA-Arg-TCT Portiera_wb_257582_257653 3'end tRNA-His-GTG Portiera_wb_257869_257750 5'end hypothetical protein          |
| WB     | 257494 | 257500 | 7      | Portiera_wb_257506_257579 5'end tRNA-Arg-TCT Portiera_wb_257582_257653 5'end tRNA-His-GTG                                                               |
| WB     | 258215 | 258308 | 94     | Portiera_wb_258453_258337 5'end hypothetical protein                                                                                                    |
| WB     | 277802 | 277808 | 7      | Portiera_wb_280469_277878 5'end Leucyl-tRNA synthetase (EC 6.1.1.4)                                                                                     |
| WB     | 334941 | 334948 | 8      | Portiera_wb_334955_335884 5'end Ribosomal large subunit pseudouridine synthase D (EC 4.2.1.70)                                                          |
| WB     | 346775 | 346776 | 2      | Portiera_wb_346829_346954 5'end hypothetical protein                                                                                                    |
| WB     | 347072 | 347154 | 83     | Portiera_wb_347677_347228 5'end tmRNA-binding protein SmpB                                                                                              |
| WB     | 42198  | 42207  | 10     | Portiera_wb_41161_42180 3'end Ornithine carbamoyltransferase (EC 2.1.3.3)                                                                               |
| WB     | 42670  | 42845  | 176    | Portiera_wb_42693_42550 hypothetical protein Portiera_wb_42968_42837 hypothetical protein                                                               |
