# Supplementary material
Source: PubMed Central journal article supplement (PMC3591977)
Supplement: AEM.02976-12_zam999104180so8.pdf [file AEM.02976-12_zam999104180so8.pdf]

**Table S5.** Unique regions in *Portiera* WQ genome within or near (100bp) gene-coding regions.

| Genome | Start  | End    | Length | Distance to genic region (Genome name_gene start_gene end, name)                              |
|--------|--------|--------|--------|-----------------------------------------------------------------------------------------------|
| WQ     | 121276 | 121283 | 8      | Portiera_wq_120744_123616 Large Subunit Ribosomal RNA; lsuRNA; LSU rRNA                       |
| WQ     | 126120 | 126147 | 28     | Portiera_wq_126246_126070 hypothetical protein                                                |
| WQ     | 135850 | 135983 | 134    | Portiera_wq_135585_135872 hypothetical protein                                                |
| WQ     | 151896 | 152003 | 108    | Portiera_wq_152022_152165 5'end hypothetical protein                                          |
| WQ     | 156692 | 156696 | 5      | Portiera_wq_156544_156663 3'end hypothetical protein                                          |
| WQ     | 157194 | 157197 | 4      | Portiera_wq_157183_157314 hypothetical protein                                                |
| WQ     | 234662 | 234669 | 8      | Portiera_wq_234700_235125 5'end ABC transporter, ATP-binding protein                          |
|        |        |        |        | Portiera_wq_257068_257141 3'end tRNA-Arg-TCT Portiera_wq_257144_257215 3'end tRNA-            |
| WQ     | 257217 | 257219 | 3      | His-GTG Portiera_wq_257403_257284 5'end hypothetical protein                                  |
| WQ     | 257750 | 257807 | 58     | Portiera_wq_257952_257836 5'end hypothetical protein                                          |
|        |        |        |        | Portiera_wq_297355_297017 3'end Glutaredoxin-related protein Portiera_wq_297468_297538        |
| WQ     | 297375 | 297387 | 13     | 5'end tRNA-Cys-GCA                                                                            |
| WQ     | 305195 | 305246 | 52     | Portiera_wq_305165_305284 hypothetical protein                                                |
| WQ     | 322825 | 322920 | 96     | Portiera_wq_322899_322768 hypothetical protein Portiera_wq_322981_322859 hypothetical protein |
| WQ     | 346368 | 346436 | 69     | Portiera_wq_346961_346512 5'end tmRNA-binding protein SmpB                                    |
| WQ     | 42458  | 42511  | 54     | Portiera_wq_42679_42539 5'end hypothetical protein                                            |
| WQ     | 42655  | 42665  | 11     | Portiera_wq_42679_42539 hypothetical protein                                                  |
